# Supplementary material for: High Prevalence of the BIM Deletion Polymorphism in Young Female Breast Cancer in an East Asian Country
Source: PLoS One. 2015 Apr 24;10(4):e0124908. doi: 10.1371/journal.pone.0124908 (PMC4409392; doi:10.1371/journal.pone.0124908)
Supplement: S1 Dataset — (XLS) [file pone.0124908.s001.xls]

## Sheet: 20130806 normal from sinica aca
PERSONID	Age		BIM deletion
TSGN1105	25		0
CG1010	26		0
CG1007	29		0
CG0940	30		0
CG1059	30		0
CG0232	31		0
CG0245	31		0
CG0933	31		0
CG0991	31		0
CG0993	31		0
CG0995	31		0
CG1024	31		0
CG1028	31		0
CG1034	31		0
CG1036	31		0
CG1064	31		0
CG1109	31		0
CG1123	31		0
CG0228	32		0
CG0295	32		0
CG0898	32		0
CG0907	32		0
CG0912	32		0
CG0997	32		0
CG1003	32		0
CG1020	32		0
CG0234	33		0
CG0320	33		0
CG0326	33		0
CG0922	33		0
CG1021	33		0
CG1043	33		0
CG0223	34		0
CG0989	34		0
CG0990	34		0
CG1018	34		0
CG1027	35		0
CG1056	35		0
CG1063	35		0
CG1201	35		0
CG1210	35		0
CG1251	35		0
CG0218	36		0
CG0230	36		0
CG0260	36		0
CG0992	36		0
CG1011	36		0
CG1035	36		0
CG1047	36		0
CG1062	36		0
CG0241	36		0
CG0313	36		0
CG0909	37		0
CG0954	37		0
CG0968	37		0
CG0973	37		0
CG1106	37		0
CG0233	37		0
CG0947	37		0
CG0953	37		0
CG0971	37		0
CG0939	38		0
CG0962	38		0
CG1005	38		0
CG1065	38		0
CG0293	39		0
CG1067	39		0
CG1116	39		0
CG1215	39		0
CG1249	39		0
CG0222	40		0
CG0265	40		0
CG0266	40		0
CG0888	40		0
CG0901	40		0
CG0902	40		0
CG0924	40		0
CG0956	40		0
CG0958	40		0
CG0983	40		0
CG0986	40		0
CG1177	40		0
CG1250	40		0
TSGN1051	40		0
TSGN1074	40		0
CG0317	41		0
CG0897	41		0
CG0910	41		0
CG0944	41		0
CG0959	41		0
CG0960	41		0
CG0978	41		0
CG1066	41		0
CG1208	41		0
TSGN1083	41		0
TSGN1094	41		0
CG0279	42		0
CG0886	42		0
CG0900	42		0
CG0926	42		0
CG0930	42		0
CG0938	42		0
CG0948	42		0
CG0952	42		0
TSGN1029	42		0
TSGN1058	42		0
TSGN1081	42		0
TSGN1100	42		0
CG0887	43		0
CG0916	43		0
CG0920	43		0
CG0921	43		0
CG0957	43		0
CG1012	43		0
CG1042	43		0
CG1068	43		0
TSGN1073	43		0
TSGN1082	43		0
TSGN1096	43		0
CG0287	44		0
CG0323	44		0
CG0903	44		0
CG0931	44		0
CG0946	44		0
CG0963	44		0
CG1015	44		0
TSGN1021	44		0
TSGN1062	44		0
TSGN1063	44		0
TSGN1098	44		0
TSGN1099	44		0
CG0911	45		0
CG0914	45		0
CG1102	45		0
TSGN1030	45		0
TSGN1049	45		0
CG0227	46		0
CG0277	46		0
CG0893	46		0
CG0896	46		0
CG0943	46		0
TSGN1037	46		0
TSGN1069	46		0
TSGN1070	46		0
TSGN1076	46		0
CG0905	47		0
CG0935	47		0
CG1050	47		0
CG1072	47		0
CG1093	47		0
CG1112	47		0
CG1127	47		0
CG1193	47		0
TSGN1066	47		0
TSGN1079	47		0
TSGN1090	47		0
TSGN1103	47		0
CG0899	48		0
CG0904	48		0
CG0925	48		0
CG0975	48		0
CG1031	48		0
CG1046	48		0
CG1234	48		0
TSGN1034	48		0
TSGN1057	48		0
TSGN1077	48		0
TSGN1092	48		0
CG0220	49		0
CG0243	49		0
CG0303	49		0
CG0306	49		0
CG0936	49		0
CG0974	49		0
CG0987	49		0
CG1008	49		0
CG1014	50		0
CG1140	50		0
CG1230	50		0
TSGN1054	50		0
TSGN1065	50		0
TSGN1101	50		0
CG0221	51		0
CG1084	51		0
CG1132	51		0
CG0271	51		0
CG0315	51		0
CG0977	51		0
CG0998	51		0
CG1197	51		0
TSGN1044	51		0
TSGN1061	51		0
TSGN1072	51		0
CG0231	52		0
CG0255	52		0
CG0267	52		0
CG0895	52		0
CG0913	52		0
CG0937	52		0
CG0945	52		0
CG0967	52		0
CG1076	52		0
CG1083	52		0
CG1168	52		0
TSGN1048	52		0
TSGN1060	52		0
TSGN1064	52		0
TSGN1086	52		0
CG0292	53		0
CG0908	53		0
CG0942	53		0
CG0950	53		0
CG0976	53		0
CG1089	53		0
CG1152	53		0
CG1224	53		0
CG1231	53		0
CG1245	53		0
TSGN1016	53		0
TSGN1033	53		0
TSGN1056	53		0
TSGN1067	53		0
TSGN1087	53		0
CG0316	54		0
CG0964	54		0
CG1023	54		0
CG1040	54		0
CG1057	54		0
CG1082	54		0
CG1238	54		0
TSGN1071	54		0
CG0242	55		0
CG0268	55		0
CG0283	55		0
CG0929	55		0
CG1026	55		0
CG1070	55		0
CG1247	55		0
CG0262	56		0
CG0932	56		0
CG1004	56		0
CG1017	56		0
CG1219	56		0
TSGN1012	56		0
TSGN1084	56		0
TSGN1085	56		0
CG0941	57		0
CG0979	57		0
CG1025	57		0
CG1167	57		0
TSGN1042	57		0
CG0269	58		0
CG0321	58		0
CG0994	58		0
TSGN1018	58		0
CG0273	59		0
CG0319	59		0
CG1113	59		0
CG1185	59		0
TSGN1041	59		0
CG1100	60		0
CG1137	60		0
TSGN1011	60		0
TSGN1078	60		0
TSGN1104	60		0
CG0284	61		0
CG0291	61		0
CG0961	61		0
CG0970	61		0
CG1049	61		0
CG1054	61		0
TSGN1017	61		0
TSGN1091	61		0
CG0272	62		0
CG1211	62		0
TSGN1013	62		0
TSGN1014	62		0
TSGN1093	62		0
CG0274	63		0
CG1088	63		0
TSGN1015	63		0
TSGN1024	63		0
CG1030	64		0
CG1080	64		0
CG0225	65		0
CG0949	65		0
CG0955	65		0
CG1092	65		0
CG1228	65		0
CG1045	66		0
CG1173	67		0
CG1244	67		0
TSGN1010	67		0
CG0923	68		0
CG0980	68		0
CG1081	68		0
CG0247	69		0
TSGN1045	69		0
TSGN1023	70		0
CG0982	71		0
CG0984	71		0
CG1121	71		0
CG1169	71		0
CG0906	74		0
CG0934	74		0
CG0951	74		0
TSGN1036	80		0
CG1220	31		1
CG0250	32		1
CG1183	32		1
CG1161	33		1
CG1181	34		1
CG1182	34		1
CG1159	36		1
CG1179	36		1
CG1206	36		1
TSGN1032	37		1
CG0257	38		1
CG0229	39		1
CG0985	40		1
TSGN1031	40		1
TSGN1050	42		1
TSGN1089	42		1
TSGN1043	43		1
CG1074	44		1
CG1164	45		1
TSGN1095	45		1
TSGN1097	45		1
CG1041	46		1
CG0244	48		1
CG1150	48		1
CG1241	48		1
TSGN1019	48		1
CG1223	49		1
TSGN1075	49		1
CG1099	50		1
CG1189	50		1
TSGN1022	50		1
TSGN1055	50		1
CG1016	51		1
CG1236	51		1
TSGN1020	51		1
CG1053	52		1
TSGN1035	52		1
CG1146	54		1
CG1184	54		1
TSGN1052	55		1
TSGN1080	55		1
CG1085	56		1
CG1101	61		1
CG1157	62		1
TSGN1047	66		1
CG1095	70		1
TSGN1068	72		1
CG1071	76		1
